# Supplementary material
Source: publisher figshare collection journal article supplement (https://f1000.figshare.com/ndownloader/files/1397216)
Supplement: Supplementary file 1 [file 1397216]

NYSMID	Zone	chr1:92426160	chr3:60134962	chr4:33800600	chr5:65740765	chr6:17110138	chr8:69650155	chr10:45343436	chr11:66863044	chr12:17166054	chr16:9533917	chr17:31508687	chr19:50618604	chr22:57259397	chr25:44793770	chr27:5811313	chr37:26421162
zm14704	northeast	AB	AB	BB	AB	AA	AB	AB	BB	AB	AB	AB	AB	AB	AB	AB	AB
zm13615	northeast	AB	AB	BB	AB	AB	AB	AB	AB	AB	BB	AB	AB	AB	AB	AB	AB
zm14627	northeast	AB	AB	AB	BB	AB	AB	AB	AA	AB	BB	AB	AB	AB	BB	AB	AB
zm15124	northeast	AB	AB	AB	AB	AB	AB	AB	AB	AA	AB	AB	AB	AB	AB	BB	AB
zm15140	northeast	AB	AB	AB	AB	AB	AB	BB	AB	AB	AB	AB	AA	AB	BB	AA	AB
zm15166	northeast	AB	AB	AB	BB	AB	AB	AB	AB	AB	AB	AA	BB	AB	AB	BB	AB
zm14522	northeast	AB	AB	AB	AB	AB	AB	AB	AB	BB	AB	BB	AB	AA	AB	AB	AB
zm14824	northeast	AB	BB	BB	AB	AB	AB	AB	AB	AB	AB	AB	AB	AB	AB	AB	AB
zm15193	northeast	AB	AB	AB	AB	AA	AA	AB	AB	AB	AB	AB	AB	AB	AB	AB	BB
zm15379	northeast	AB	BB	AB	AB	BB	AA	AA	AB	AA	AB	AB	AB	BB	AB	AB	AB
zm14625	northeast	BB	AA	AB	AB	AB	AA	AA	AB	AA	AB	AB	AB	AA	AB	AB	AB
zm14802	northeast	BB	AB	AB	AB	AB	AB	AB	BB	AB	AB	AB	BB	AB	AA	AB	AB
zm13984	northeast	AA	AB	BB	AB	AB	AA	AA	AA	BB	BB	-	AB	AA	BB	AA	AB
zt241	northeast	AA	AB	BB	AA	AA	AA	BB	AA	-	AA	AA	BB	BB	AA	AA	AB
zm14705	northeast	AB	AB	BB	AB	AA	AA	AA	AA	BB	AA	AB	AB	AA	AB	-	AB
zt382	northeast	AB	AA	BB	AA	AA	AB	BB	AB	BB	AA	-	BB	AB	BB	AA	BB
zm14807	northeast	BB	AB	BB	AA	AB	AB	AB	AA	-	BB	BB	AB	BB	AB	AB	AA
zm14206	northeast	AA	AB	BB	-	AB	AA	AA	AA	AA	BB	BB	AB	BB	BB	-	BB
zm15144	northeast	AA	AB	BB	-	BB	AA	-	AA	BB	AA	AA	AA	AA	AA	AA	AA
zm13580	northeast	AB	AB	BB	-	BB	AB	-	AA	BB	BB	BB	BB	AB	AA	AB	AA
zm14592	northeast	AB	AB	BB	AB	BB	AA	-	AA	-	BB	BB	AB	AA	BB	AA	BB
zt220	northeast	AB	AB	BB	-	AB	AB	BB	-	AA	BB	AB	AB	AB	BB	AA	BB
zt252	northeast	AB	AB	BB	-	AA	BB	BB	AA	AA	BB	AA	BB	BB	-	AA	AA
zt353	northeast	AB	AA	BB	AA	AB	AA	AA	AA	AA	-	AB	BB	BB	BB	-	AB
zt391	northeast	AB	AA	BB	AA	BB	AB	BB	AA	BB	AA	-	-	AB	BB	AA	AA
zm15583	northeast	BB	BB	AB	AB	AB	AA	AB	AB	BB	-	-	AA	AA	AB	AB	AB
zm15612	northeast	BB	BB	BB	AB	-	AB	AB	AA	BB	BB	-	AB	BB	AB	AB	AB
zm15194	northeast	-	-	BB	AB	AA	AB	AB	AA	AA	AB	BB	AB	-	AB	AB	AB
zm15196	northeast	-	AA	AB	AB	AA	AA	AB	AB	-	AB	BB	AB	BB	BB	-	AA
zm14624	northeast	AA	AB	BB	-	BB	AA	AB	AB	BB	AB	-	AB	AA	BB	-	BB
zm14706	northeast	AA	AB	BB	BB	AA	AB	AB	AA	AB	AB	-	-	-	BB	AA	AA
zm15145	northeast	AA	AB	BB	AB	AA	AA	-	AA	AA	BB	AA	-	BB	-	AA	AA
zm15175	northeast	AA	AA	BB	AB	BB	AB	AB	AB	-	BB	-	-	BB	BB	AB	AA
zt357	northeast	AA	AA	AB	AA	BB	AB	-	-	AA	BB	AB	BB	AB	BB	-	BB
zm14702	northeast	AB	AB	BB	-	BB	AB	-	AB	BB	AA	-	AA	AA	BB	AA	BB
zm14769	northeast	AB	AB	BB	-	AB	AB	AB	AB	-	AB	-	AA	AB	BB	AB	AB
zm14781	northeast	AB	AB	BB	-	-	AB	AA	AA	-	BB	BB	AB	BB	AB	BB	AA
zm15537	northeast	AB	-	BB	AB	-	AB	AA	AB	BB	BB	AB	-	AA	BB	BB	AB
zm15544	northeast	AB	BB	-	AB	-	AA	AB	AA	AA	BB	-	AB	AA	AB	AB	AA
zt2	northeast	AB	AB	BB	AA	AA	-	BB	AA	BB	BB	-	AB	-	AA	AA	AB
zt403	northeast	AB	-	AB	AB	AA	AA	AB	AA	AA	-	-	AA	BB	BB	AB	AA
zt5	northeast	AB	AB	BB	AA	-	AB	AA	-	AA	BB	-	AA	AA	AB	AB	AB
zm13499	northeast	BB	AB	BB	-	-	AA	AB	AA	BB	BB	-	BB	AB	AA	AA	AB
zm15582	northeast	BB	AB	-	BB	BB	AA	AB	AA	AB	-	-	AA	BB	AB	AB	AB
zt7	northeast	BB	AA	BB	AB	AB	AA	-	AB	BB	-	AB	-	AB	BB	AB	AA
zt9	northeast	BB	AB	BB	-	-	AB	AB	AB	BB	BB	-	AA	AA	AB	AA	AB
zm13986	northeast	-	AB	BB	-	BB	AA	AA	AA	BB	BB	-	AA	BB	BB	-	BB
zm15119	northeast	-	AB	BB	AB	-	AA	AB	AB	-	AB	BB	AB	AA	BB	-	BB
zm15584	northeast	-	AB	BB	BB	AA	AA	-	AA	BB	AB	-	AB	-	AB	AB	AB
zt399	northeast	-	-	BB	AA	AA	AA	BB	AA	-	BB	-	BB	BB	AA	AA	BB
zt697	northeast	-	AB	BB	AA	AA	-	BB	AB	AA	BB	BB	-	AA	-	AA	AA
zm13657	northeast	AA	AB	BB	AB	BB	AB	AA	AA	-	-	-	AB	AA	AB	-	AA
zm14487	northeast	AA	AB	AB	BB	-	AA	AA	AA	-	AB	-	AB	AA	BB	AB	-
zm14981	northeast	AA	AB	BB	AB	-	AB	AB	AB	AB	-	-	AB	-	BB	AB	BB
zm15180	northeast	AA	-	AB	AB	-	AA	-	-	AA	BB	AA	AB	AB	AB	AB	BB
zt253	northeast	AA	AB	BB	-	AA	BB	BB	-	-	BB	-	BB	AB	AA	AA	AB
zt40	northeast	AA	AB	BB	AA	AA	AA	AB	-	-	BB	AB	-	-	AB	AA	AB
zt698	northeast	AA	-	BB	AA	-	-	BB	AB	-	AA	AA	BB	BB	AA	AA	BB
zm13971	northeast	AB	AB	BB	-	BB	AB	AA	-	BB	BB	-	AA	BB	AB	-	AB
zm13982	northeast	AB	AB	BB	-	AB	AB	-	AA	-	BB	AA	AB	AA	AB	-	AA
zm14663	northeast	AB	AB	AB	AB	-	AB	-	AB	AA	-	AA	AB	AB	BB	AB	-
zm14754	northeast	AB	-	AB	AB	-	-	AB	AB	-	BB	AB	AB	AB	BB	AB	BB
zm15143	northeast	AB	AA	AB	-	BB	AA	AA	AA	BB	BB	AA	-	-	BB	-	AB
zm15525	northeast	AB	BB	AB	AB	-	AB	AB	AB	AA	-	-	AB	AB	BB	-	AA
zm15611	northeast	AB	AB	BB	-	-	AB	-	AA	-	AB	BB	AB	BB	AB	AB	AB
zm15627	northeast	AB	AB	BB	-	BB	AA	BB	AA	AA	AA	-	-	AA	-	AA	BB
zt11	northeast	AB	AB	BB	AA	BB	-	BB	AA	AA	AA	-	-	BB	BB	-	BB
zt238	northeast	AB	-	BB	AA	BB	AA	BB	-	BB	BB	-	BB	AB	AB	-	AB
zt240	northeast	AB	AB	AB	AA	-	AB	-	-	BB	BB	BB	AB	AB	AA	-	AB
zt3	northeast	AB	AB	BB	BB	BB	AA	-	AA	AA	BB	-	-	BB	AB	-	BB
zt360	northeast	AB	AB	BB	AA	AA	-	-	AB	AA	BB	-	-	AB	AB	AB	AA
zt369	northeast	AB	AA	BB	-	AB	AB	AA	AA	AA	BB	-	-	AB	AB	-	AA
zt383	northeast	AB	-	BB	AA	BB	BB	-	AA	-	AA	AB	BB	BB	-	AA	AB
zt401	northeast	AB	AB	BB	-	BB	-	BB	AA	AA	AA	-	BB	BB	-	AA	AA
zm14703	northeast	BB	AA	BB	AA	BB	AB	AA	AB	-	BB	-	AB	-	AB	-	AB
zm15123	northeast	BB	-	-	AB	-	AB	AB	AA	AB	AA	BB	AB	AA	AB	-	BB
zm15172	northeast	BB	-	AB	AB	-	AA	-	AB	AA	BB	AB	BB	-	BB	AB	AA
zm15585	northeast	BB	AB	BB	AB	AA	AA	AB	AB	-	-	BB	AB	-	AB	-	AB
zm15588	northeast	BB	BB	-	AB	AB	AB	AB	AA	-	BB	-	AA	BB	BB	AB	-
zt1	northeast	BB	AB	BB	-	-	AB	BB	AA	BB	AA	-	-	AB	AA	AA	AA
zt10	northeast	BB	AB	BB	BB	AA	AA	AA	-	-	AA	-	AA	AA	BB	-	AB
zm13642	northeast	-	AA	BB	AB	-	AA	-	AA	-	BB	-	AB	AB	BB	AB	AB
zt213	northeast	-	AB	BB	-	BB	AB	BB	AA	-	BB	AB	-	BB	-	AA	AB
zt232	northeast	-	-	BB	AA	BB	AA	-	-	BB	AA	-	BB	AB	AB	AA	AB
zt239	northeast	-	AB	BB	AA	AA	AA	BB	AA	AA	BB	-	-	BB	-	-	BB
zt290	northeast	-	AB	BB	AA	AA	AB	AB	AA	-	BB	-	-	AB	-	AA	AA
zt400	northeast	-	AB	BB	AA	AA	BB	BB	-	-	BB	-	BB	AA	-	AA	AB
zt614	northeast	-	AB	BB	-	BB	BB	BB	AB	AB	BB	BB	-	AA	-	-	AA
zm14276	northeast	AA	-	BB	-	AA	AB	-	AA	BB	-	-	AB	BB	BB	AB	AA
zt142	northeast	AA	AB	BB	-	BB	-	AA	AA	BB	-	-	AA	AB	AB	-	AB
zt206	northeast	AA	AA	BB	AA	-	AB	-	-	-	BB	AB	BB	AB	AB	-	AA
zt250	northeast	AA	AB	BB	-	AA	-	BB	AA	BB	AA	-	-	AB	-	AA	AB
zt395	northeast	AA	AB	BB	-	AA	-	BB	AB	AA	BB	AA	-	-	-	AA	AA
adk2853	northeast	AB	AB	BB	BB	-	AA	AA	AB	AA	BB	-	-	-	AB	-	AB
zm15146	northeast	AB	AB	BB	BB	-	AB	AA	-	AA	BB	BB	-	-	-	AA	AA
zm15190	northeast	AB	-	-	AB	-	AB	AB	-	-	AB	BB	AB	AB	AA	AB	AB
zm15575	northeast	AB	-	AB	AB	-	AA	AB	AB	-	BB	-	AB	AB	BB	AB	-
zm15613	northeast	AB	AA	-	-	AB	AA	BB	AB	-	-	-	AB	AB	BB	AB	AB
zm15614	northeast	AB	BB	BB	AB	-	AB	-	-	-	AB	-	AB	AB	AB	AB	BB
zm15626	northeast	AB	BB	AB	AB	-	-	AB	AA	-	-	-	AB	AB	BB	AB	AA
zt12	northeast	AB	AB	BB	-	-	AB	-	AA	AA	BB	-	-	AA	AB	AA	AB
zt14	northeast	AB	AA	BB	-	BB	AB	-	-	AA	BB	AA	BB	-	BB	-	AB
zt148	northeast	AB	-	BB	AA	-	-	AA	AA	AA	BB	-	AA	AB	BB	-	BB
zt227	northeast	AB	AA	AB	AA	-	AB	-	AA	AA	BB	AA	-	-	BB	-	AA
zt251	northeast	AB	AB	BB	-	AA	AA	-	AB	AA	AA	-	-	BB	-	AA	AB
zt387	northeast	AB	AB	BB	-	-	BB	BB	AA	-	AA	-	BB	AB	-	AA	AB
zt388	northeast	AB	AB	BB	-	-	AA	BB	AB	AA	BB	-	-	AB	-	AA	AA
zt465	northeast	AB	AA	BB	AA	AA	-	-	AB	-	BB	AB	-	-	AA	AA	AB
zt6	northeast	AB	AB	BB	AA	BB	-	AA	-	BB	BB	BB	-	-	AB	-	AB
zm14520	northeast	BB	AB	BB	-	AA	AA	-	-	BB	AA	-	-	AB	BB	AA	BB
zm15142	northeast	BB	AB	BB	-	AA	-	-	AB	-	AA	AA	AB	AB	AB	-	AB
zm15610	northeast	BB	AB	BB	AA	BB	AB	-	AB	-	-	-	AA	AA	AB	-	AB
zt210	northeast	BB	-	BB	AB	-	AA	AB	AA	-	BB	-	-	AA	BB	AB	AA
zm15137	northeast	-	-	AA	-	-	AB	AB	-	BB	AB	BB	AB	-	BB	AB	AA
zm15586	northeast	-	BB	AB	AB	-	AB	AA	-	BB	AB	-	-	-	BB	AB	AA
zt380	northeast	-	AB	BB	-	AA	BB	BB	AA	AA	-	-	-	BB	-	AA	BB
zt394	northeast	-	AB	BB	-	-	-	AA	-	AA	BB	AA	AB	AB	-	AA	AA
zt696	northeast	-	-	BB	AA	AA	AA	BB	-	-	AB	AB	-	BB	-	AA	AA
zt254	northeast	AA	AB	BB	-	BB	AB	BB	-	BB	AA	-	-	AB	-	-	AA
zm13977	northeast	AB	AB	BB	-	-	AA	-	AA	-	BB	BB	-	AA	AB	AA	-
zm14662	northeast	AB	-	AA	AB	BB	AB	-	-	-	BB	AB	-	AA	AB	-	AA
zm14780	northeast	AB	AB	BB	-	-	AB	AA	AB	-	-	-	-	AA	BB	AB	AA
zm15570	northeast	AB	-	-	AB	-	AA	-	AB	-	BB	-	AB	BB	BB	AB	AA
zm15609	northeast	AB	AB	BB	-	AB	AB	AB	-	-	-	-	-	BB	AB	BB	AB
zt273	northeast	AB	AB	BB	-	BB	AA	BB	-	BB	-	-	-	BB	-	AA	AA
zm15121	northeast	BB	-	AB	AB	-	AB	-	AB	-	BB	-	AB	-	AB	AB	AB
zm15173	northeast	BB	-	AB	AB	AA	-	-	AB	-	AB	-	AB2	-	AB	AB	AA
zm15622	northeast	BB	-	-	AB	-	AA	AB	-	AA	-	-	AB	AB	BB	AB	AA
zt13	northeast	BB	AB	BB	AA	-	AB	-	AA	-	-	BB	AB	-	AB	-	AA
zt4	northeast	BB	AB	BB	-	-	-	AA	-	-	BB	-	AB	AA	AB	AA	AA
adk2669	northeast	-	-	AB	AB	-	AB	-	-	-	AB	AA	AA	-	BB	AB	AB
adk2796	northeast	-	AB	BB	-	-	-	AB	-	BB	BB	BB	-	AA	-	AB	AB
adk2880	northeast	-	-	AB	BB	-	-	AB	-	AA	AA	BB	AB	-	AB	BB	-
mcz63139	northeast	-	-	BB	AB	AB	AB	-	AB	-	-	-	AB	BB	-	AA	AA
mcz63145	northeast	-	AB	-	-	AB	AA	-	-	-	AB	AA	AB	AB	-	AB	BB
zm15147	northeast	-	-	-	-	-	AA	AB	AB	-	-	BB	AB	AB	BB	AB	AA
zm15198	northeast	-	AB	AB	-	AB	AB	-	AA	-	-	-	AB	-	BB	BB	AA
zm15292	northeast	-	AB	BB	AB	BB	AA	-	AA	-	-	-	-	AB	BB	AB	-
zt384	northeast	-	AB	BB	-	-	-	BB	AB	AA	BB	-	-	AB	-	AA	BB
zt389	northeast	-	AA	BB	AA	BB	-	-	AB	-	BB	-	-	AB	-	AA	AB
zt657	northeast	-	AA	AB	AB	BB	-	-	AA	-	-	-	AB	AB	AB	-	AA
zt275	northeast	AA	AB	BB	-	-	-	AB	-	BB	BB	AB	-	-	AB	-	BB
zt396	northeast	AA	AB	BB	-	BB	-	BB	-	-	BB	-	-	AB	-	AA	AA
zt43	northeast	AA	AA	BB	AA	-	-	BB	-	-	BB	-	-	-	BB	AA	AB
zm15536	northeast	AB	BB	-	AB	-	-	-	AA	-	BB	-	AB	AB	-	AB	AA
zm15576	northeast	AB	-	AB	-	BB	-	AA	AB	-	BB	-	AB	AA	BB	-	-
zt258	northeast	AB	AB	BB	-	AA	AA	-	-	-	BB	-	-	AA	AB	-	AB
zt393	northeast	AB	-	BB	-	-	-	-	AB	AA	AA	AB	AB	BB	-	-	AB
zt361	northeast	BB	AB	BB	-	-	AB	-	-	-	BB	-	BB	BB	-	AA	AB
adk2868	northeast	-	-	-	BB	-	AA	AB	-	-	AB	BB	BB	-	-	AB	AB
mcz63344	northeast	-	AB	-	AB	AB	AA	-	AA	-	-	AB	-	BB	-	-	BB
zm13652	northeast	-	AB	-	AB	-	-	AB	-	-	AB	-	AB	-	BB	AB	AA
zt402	northeast	-	-	BB	-	AA	-	BB	-	-	BB	-	BB	AB	-	AA	AB
zt221	northeast	AA	-	BB	-	-	-	BB	-	AA	BB	-	-	AB	-	AA	AA
zm13582	northeast	AB	AB	BB	-	-	-	-	-	BB	-	-	-	AB	AB	AB	AA
zt385	northeast	AB	AB	BB	-	AA	-	-	-	-	BB	-	AB	AB	-	-	AA
zm14701	northeast	BB	-	-	AB	-	AB	-	-	-	BB	-	AB	BB	BB	AB	-
zm15126	northeast	BB	-	AA	AB	-	AA	-	-	-	-	-	AB	-	BB	BB	AA
mcz63140	northeast	-	-	-	-	-	AB	-	AB	-	BB	-	AB	BB	AB	-	BB
mcz63683	northeast	-	AB	-	AB	-	AA	-	AB	-	-	AB	-	-	-	AB	AA
zt362	northeast	-	AB	BB	BB	-	AB	BB	-	-	BB	-	-	-	-	-	AA
zt381	northeast	-	AA	BB	AA	-	-	AB	-	-	BB	-	-	AB	-	-	AA
zt421	northeast	-	-	AA	AB	AA	-	AB	-	-	AB	-	AB	-	-	AB	-
adk2855	northeast	-	-	-	AB	-	AA	AB	-	-	-	-	AB	AB	-	BB	-
zm14595	northeast	-	-	AA	AB	-	AA	AB	AA	-	-	-	-	-	-	AB	-
zm14767	northeast	-	-	AA	AB	-	BB	AB	-	-	BB	-	-	-	-	AB	-
zm15151	northeast	-	-	-	AB	-	AA	AB	AA	-	BB	-	-	-	-	AB	-
zm15168	northeast	-	-	AA	AB	-	AB	-	-	-	BB	AB	AB	-	-	-	-
zm15176	northeast	-	-	AA	AB	-	-	AB	-	-	BB	-	AB	-	-	AB	-
zm15629	northeast	-	-	AB	AB	-	-	-	AB	-	-	-	AB	-	AB	AB	-
zm15623	northeast	AB	-	-	-	AB	-	-	AA	-	-	-	-	-	-	AB	AB
zm14708	northeast	-	-	-	AB	-	-	AB	-	-	BB	-	AB	-	-	-	-
zm15159	northeast	-	-	AA	BB	-	-	-	-	-	-	-	AB	-	-	AB	-
zm15171	northeast	-	-	-	AB	-	-	-	-	BB	-	-	AB	-	-	AB	-
zt678	northeast	-	-	AB	-	-	-	-	-	-	-	-	-	AA	-	AB	BB
zm15158	northeast	-	-	-	-	-	-	-	-	-	BB	-	AB	-	-	AB	-
zm15162	northeast	-	AB	-	-	-	-	-	-	-	-	-	AB	-	-	-	BB
zm15317	northeast	-	-	-	-	-	-	-	-	-	-	AA	-	-	-	-	-
zm15079	contact	AB	BB	AB	AA	AB	BB	BB	AB	AB	AA	AB	AB	AB	AB	AB	AB
zm15082	contact	AB	AB	BB	AB	AB	AB	AB	AB	AB	AB	AB	BB	AB	AB	AB	BB
zt173	contact	BB	AA	BB	AA	AA	AA	AA	AA	AA	BB	AB	BB	BB	AB	AA	BB
zt347	contact	BB	AB	AB	AB	AB	AB	AB	BB	AB	AB	AA	AB	AB	AB	AB	AA
zt625	contact	BB	AA	BB	AA	AA	AB	AA	AA	BB	BB	AA	BB	AA	BB	AA	AA
zt201	contact	AA	BB	BB	AB	AB	AA	AB	AB	BB	-	BB	AB	AB	AB	AB	AB
zt606	contact	AA	AB	BB	AA	BB	AA	BB	AB	AA	BB	AA	-	BB	AA	AA	AB
zm15077	contact	AB	AB	BB	AA	AA	AA	BB	AB	BB	BB	-	BB	BB	BB	AA	BB
zm15625	contact	AA	-	AB	AB	AB	BB	AA	AB	-	AA	BB	AB	BB	BB	AB	AA
zt300	contact	AA	AB	BB	-	AA	AB	BB	AA	AA	AA	AB	BB	AB	-	AA	AA
zt320	contact	AA	AA	BB	AA	BB	AA	-	AA	-	BB	AB	BB	AA	BB	AA	AA
zt196	contact	AB	AA	BB	AA	BB	AA	AA	-	BB	BB	AA	-	AB	BB	AA	AA
zt226	contact	AB	AB	BB	AA	AA	-	BB	AA	BB	BB	BB	-	AB	AB	AA	AA
zt249	contact	AB	AB	BB	BB	AA	AB	-	AB	BB	AA	AA	-	AB	AA	AA	AB
zt303	contact	AB	AB	BB	-	AA	AB	BB	AA	BB	BB	AB	-	AB	AA	AA	BB
zt341	contact	AB	AA	BB	AA	BB	AB	AB	AA	AA	AB	-	BB	BB	BB	-	AA
zt188	contact	BB	AA	BB	AA	BB	AB	BB	-	AA	AA	AA	BB	-	AB	AB	AA
zt244	contact	BB	AB	BB	AA	BB	AA	BB	AA	BB	BB	-	-	BB	AB	AA	AA
zt311	contact	BB	AB	BB	-	AA	AA	BB	AA	BB	AA	AA	-	AB	BB	AA	BB
zt338	contact	BB	AA	BB	AA	-	AA	BB	AB	BB	BB	-	BB	AB	AA	AA	BB
zt170	contact	-	AA	BB	AA	AA	-	BB	AA	BB	BB	-	BB	BB	BB	AA	BB
zt315	contact	-	AA	BB	AA	AA	AA	-	AB	AA	AA	-	BB	AB	AB	AA	AA
zt414	contact	-	AA	BB	AA	AA	AA	AA	AA	-	AB	AB	AA	-	AB	AB	AB
zt190	contact	AA	AA	BB	AA	AA	AA	AA	BB	BB	-	-	-	BB	BB	AA	BB
zt325	contact	AA	-	BB	AA	BB	AA	BB	BB	-	AB	AB	BB	BB	-	AA	AB
zt336	contact	AA	AA	BB	AA	BB	AA	AB	-	BB	BB	BB	-	AB	BB	-	AB
zm15617	contact	AB	AA	AB	-	BB	AA	AB	-	BB	AB	BB	-	BB	AB	AB	AB
zt179	contact	AB	AA	BB	AA	AA	AA	-	AA	-	BB	AB	BB	BB	AB	-	AB
zt192	contact	AB	AA	BB	AA	BB	AB	-	AA	AA	BB	-	BB	AB	BB	-	BB
zt222	contact	AB	AB	BB	AA	-	AB	BB	BB	-	BB	AB	AA	AB	-	AA	AB
zt247	contact	AB	AB	BB	-	AB	AA	BB	AB	BB	AA	-	-	AB	BB	AA	AA
zt264	contact	AB	AB	BB	-	BB	AB	BB	AA	-	BB	AA	-	AB	BB	AA	AB
zt329	contact	AB	AA	BB	AA	BB	AB	BB	-	-	AB	BB	-	BB	AA	AA	AA
zt330	contact	AB	AB	BB	-	BB	AA	AB	-	BB	BB	-	BB	AB	AA	AA	AA
zt348	contact	AB	AA	BB	AA	AA	AB	-	-	AA	BB	AB	BB	AB	BB	-	BB
zt350	contact	AB	AB	BB	-	AA	AB	-	AB	AA	BB	BB	AA	AA	AB	-	AB
zt449	contact	AB	AA	BB	AA	BB	AA	AB	-	BB	AB	AA	-	BB	BB	AB	-
zt454	contact	AB	AB	BB	AB	AA	-	AA	AA	-	-	AB	AA	AB	AB	AB	BB
zt466	contact	AB	AA	-	AA	AA	AB	AA	-	-	AB	AA	BB	AB	BB	AB	AB
zt605	contact	AB	AB	BB	AA	AA	AA	-	AA	-	BB	AB	-	BB	AB	AA	AA
zt629	contact	AB	AA	BB	AA	-	AA	BB	-	AA	BB	AB	-	AA	AB	AA	BB
zt692	contact	AB	AB	BB	AA	AA	AB	-	-	AA	BB	-	BB	BB	AB	AA	AB
zt704	contact	AB	AB	BB	-	AA	-	BB	AA	AA	AA	AB	BB	AB	-	AA	AA
zt175	contact	BB	AA	BB	AA	AA	AB	-	AA	AA	-	BB	BB	BB	BB	-	AB
zt183	contact	BB	AB	BB	-	AA	AA	-	AA	AA	BB	AB	-	BB	AA	AA	BB
zt185	contact	BB	AA	BB	AA	BB	AB	-	AA	-	BB	AA	BB	AA	-	AA	BB
zt446	contact	BB	AA	BB	AA	BB	AA	-	AA	BB	AA	AA	-	AB	BB	-	BB
zt609	contact	BB	AB	BB	AA	AA	AB	BB	-	BB	BB	AA	-	BB	AA	-	AA
zt627	contact	BB	AB	BB	AA	AA	-	BB	AB	BB	BB	-	AB	BB	-	AB	AB
zt326	contact	-	AA	BB	-	AA	BB	BB	AA	-	BB	AB	-	BB	AA	AA	AB
zt607	contact	-	AB	BB	AA	AA	AB	-	AA	AA	AA	BB	BB	BB	-	-	AB
zt693	contact	-	AB	BB	AA	AA	-	BB	-	AA	BB	BB	BB	AA	-	AA	AB
zt163	contact	AA	AA	BB	AA	BB	AB	-	-	AA	BB	-	BB	AB	-	AA	AA
zt203	contact	AA	-	BB	AA	BB	AB	BB	AA	-	BB	AB	-	AA	-	AA	BB
zt305	contact	AA	AB	BB	-	BB	AB	-	AA	BB	BB	-	BB	BB	AB	-	AB
zt314	contact	AA	AA	BB	AA	BB	AA	-	-	AA	AA	-	-	AA	BB	AA	BB
zt349	contact	AA	AA	BB	-	AA	AB	-	AA	BB	-	-	BB	AB	BB	AA	BB
zt418	contact	AA	AB	BB	-	-	AA	BB	-	AA	BB	AA	-	AB	AB	AA	BB
zt457	contact	AA	AA	BB	AA	BB	AB	AA	AB	-	AB	-	-	BB	AB	-	AB
zt460	contact	AA	AB	BB	-	AA	AA	-	AB	BB	BB	-	-	BB	AB	AA	AA
zt472	contact	AA	AB	BB	-	-	AB	BB	AA	BB	BB	-	BB	AB	-	AA	AB
zt602	contact	AA	-	BB	-	-	-	BB	AB	BB	BB	AB	BB	AB	AA	AA	AA
zt623	contact	AA	-	BB	AA	AA	BB	BB	-	-	BB	BB	-	BB	AA	AA	AB
zt691	contact	AA	-	BB	-	AA	AB	BB	AA	-	BB	AB	BB	-	BB	AA	BB
zt700	contact	AA	AB	BB	-	AA	-	BB	AA	-	AA	AA	BB	BB	-	AA	AB
zt168	contact	AB	-	BB	AA	AA	AA	AA	-	-	BB	AA	-	AA	AA	AA	AB
zt171	contact	AB	AB	BB	-	AA	AA	-	AA	AA	AA	-	-	AB	AA	AA	AA
zt242	contact	AB	AA	BB	AA	BB	AB	-	-	AA	BB	AB	-	AA	AB	-	AB
zt260	contact	AB	AB	BB	-	BB	AB	-	-	AA	BB	AA	BB	AB	AB	-	AB
zt262	contact	AB	AB	BB	AA	-	AA	AA	-	BB	BB	-	AA	BB	AA	-	BB
zt307	contact	AB	AB	BB	-	AB	AA	-	AB	AA	BB	-	-	AA	AB	AA	AB
zt318	contact	AB	AA	BB	AA	AA	AB	-	-	BB	AA	-	BB	AA	AA	-	BB
zt337	contact	AB	AA	BB	BB	AA	-	-	AA	AA	BB	-	-	BB	AB	AA	AA
zt459	contact	AB	AB	BB	BB	AB	AB	AA	-	-	BB	AA	-	-	AB	AB	AA
zt469	contact	AB	AB	BB	-	-	-	AA	-	BB	BB	AB	BB	BB	AB	AA	AB
zt480	contact	AB	AB	BB	-	AA	AB	AA	AA	-	BB	AA	-	AB	-	AA	AB
zt482	contact	AB	AB	BB	BB	-	AA	AA	AA	-	BB	AB	-	-	BB	AB	AA
zt484	contact	AB	AB	BB	-	BB	AA	-	AA	BB	BB	AA	-	BB	-	AA	AB
zt603	contact	AB	AB	BB	-	-	AA	BB	AB	BB	BB	AA	AA	AB	-	-	AA
zt608	contact	AB	AB	BB	AA	-	BB	-	-	AA	BB	AA	BB	AB	-	AA	AA
zt610	contact	AB	-	BB	AA	AA	BB	-	AA	AA	BB	-	BB	BB	-	AA	AA
zt694	contact	AB	-	BB	AA	BB	AB	-	AA	AA	BB	AB	BB	BB	-	-	BB
zt701	contact	AB	-	BB	AA	BB	-	BB	AA	BB	BB	AA	-	BB	AA	AA	-
zm15624	contact	BB	AA	AB	AB	-	AB	-	AB	AA	BB	-	-	AB	BB	AB	AB
zt267	contact	BB	AB	BB	-	AA	AA	-	AA	AA	-	AA	-	BB	AA	AA	AA
zt299	contact	BB	AB	BB	-	AA	AA	BB	-	BB	BB	-	BB	AA	-	AA	AA
zt339	contact	BB	AA	BB	AA	AA	AB	-	AA	AA	AA	-	-	BB	BB	-	AA
zt415	contact	BB	AA	BB	-	BB	AA	AB	-	BB	BB	-	-	AB	AB	AA	AB
zt458	contact	BB	AB	BB	-	AA	AA	AA	AA	-	BB	BB	-	AB	AB	-	AB
zt479	contact	BB	AB	BB	AA	-	-	BB	-	AA	BB	-	BB	BB	AA	AA	AB
zt600	contact	BB	AB	BB	-	AA	-	BB	AA	BB	AA	AB	-	AB	-	AA	AB
zt601	contact	BB	AB	BB	-	AA	AB	-	AA	BB	BB	-	-	AB	AB	AA	AB
zt690	contact	BB	AA	BB	-	BB	AA	-	-	BB	BB	AA	-	BB	AA	AA	BB
zt699	contact	BB	AA	BB	AA	AA	AB	-	-	AA	AA	-	-	BB	AA	AA	AB
zm15621	contact	-	BB	AB	AB	-	AA	AB	-	-	BB	AB	AB2	-	BB	BB	AA
zt177	contact	-	-	BB	AA	AA	AB	-	-	AA	BB	BB	-	BB	AA	AA	AA
zt404	contact	-	AB	BB	-	BB	AB	BB	AB	AA	BB	AB	-	-	-	AA	AB
zt406	contact	-	AA	BB	AA	BB	-	AB	-	AA	BB	AB	-	AB	BB	-	AA
zt409	contact	-	AB	BB	-	AA	-	BB	AA	-	AA	AB	BB	AB	-	AA	AA
zt456	contact	-	BB	-	AA	-	AB	AB	AB	-	-	AB	AB	AB	AB	AB	BB
zt475	contact	-	AB	BB	-	-	-	BB	AB	AA	BB	AB	AA	AA	-	AA	AB
zm15620	contact	AA	BB	AB	AB	-	-	AB	-	BB	-	AB	AB	AB	AB	-	AB
zt413	contact	AA	AA	BB	AA	-	AB	AA	AB	-	AB	-	-	AB	-	AA	AB
zt476	contact	AA	AB	BB	-	BB	AA	-	-	BB	BB	AB	-	AB	-	AA	AB
zt695	contact	AA	-	BB	AA	BB	-	BB	AB	AA	AA	AB	-	BB	-	-	AA
zm15285	contact	AB	-	BB	AB	-	AA	-	AB	-	BB	BB	-	BB	BB	AB	AA
zt194	contact	AB	-	BB	AA	AA	AB	-	-	BB	AA	-	-	BB	AA	AA	AA
zt310	contact	AB	-	BB	-	AB	AA	BB	AA	-	BB	-	AB	-	AB	AA	AA
zt312	contact	AB	AB	BB	-	BB	-	-	-	BB	BB	-	BB	AB	AA	AA	AA
zt334	contact	AB	AB	BB	-	BB	-	-	AA	AA	BB	AB	AA	-	-	AA	AB
zt455	contact	AB	-	AB	-	BB	AA	-	AB	BB	AB	AB	-	AA	BB	-	AA
zm15616	contact	BB	AB	BB	AA	AA	-	-	AA	-	BB	BB	-	AB	AB	-	AA
zt182	contact	BB	AA	BB	-	AA	AB	-	-	BB	AB	BB	-	AA	AB	-	AA
zt417	contact	BB	AB	BB	-	-	AA	-	AA	AA	BB	-	BB	AA	-	AA	AB
zt450	contact	BB	AB	BB	-	AA	AB	-	AA	-	BB	-	-	BB	AA	AA	AA
zt462	contact	BB	AB	BB	BB	AA	-	-	AB	-	BB	-	AB	BB	-	AA	AB
zt604	contact	BB	AB	BB	AA	-	AA	-	AA	-	AB	-	-	BB	BB	AA	AB
zt632	contact	BB	AA	BB	AA	BB	AA	-	AA	-	BB	AB	-	BB	-	-	AB
zm15618	contact	-	-	AB	AB	-	AA	AB	AA	-	AB	-	AA	BB	BB	AB	-
zt165	contact	-	AA	BB	AA	AA	AA	-	AA	-	AA	BB	-	-	BB	-	AB
zt184	contact	-	AA	BB	AA	AA	AB	AA	-	-	-	-	BB	BB	AA	-	AA
zt187	contact	-	-	AB	-	AA	AB	AA	AA	AA	BB	-	-	BB	BB	-	AB
zt309	contact	-	-	BB	-	BB	AB	BB	AB	-	AA	AB	AA	AB	-	-	AA
zt412	contact	-	AB	BB	-	-	AB	AA	AB	-	BB	AB	-	AB	BB	-	AB
zt333	contact	AA	AB	BB	-	-	-	-	AA	AA	BB	AB	AB	-	-	AA	AB
zt468	contact	AA	AA	BB	-	-	AB	AA	-	-	BB	AA	-	AB	BB	-	AB
zt478	contact	AA	AB	BB	-	AA	-	-	AA	BB	-	-	BB	AA	-	AA	AB
zt200	contact	AB	-	BB	AA	-	AB	-	-	-	-	AB	BB	BB	AB	AA	BB
zt302	contact	AB	AB	BB	-	AA	-	-	-	-	BB	AA	BB	AA	-	AA	AA
zt323	contact	AB	AA	BB	AA	AB	AB	-	AA	AA	AA	-	-	-	AB	-	-
zt327	contact	AB	AB	BB	-	AB	-	-	-	AA	AA	-	BB	AB	AA	-	AB
zt41	contact	AB	AB	-	BB	-	AB	-	-	BB	AA	BB	-	-	AB	AB	AB
zt452	contact	AB	AB	BB	-	AB	AB	-	-	AA	BB	-	-	AB	AA	-	BB
zt471	contact	AB	AB	BB	-	-	-	BB	AA	-	BB	AA	AA	-	-	AB	AA
zm15628	contact	BB	-	-	AB	-	-	AB	AA	-	AA	AA	AB	AA	BB	-	BB
zt451	contact	BB	AB	BB	-	BB	AB	BB	AB	-	BB	-	-	BB	-	-	AA
zt642	contact	BB	AA	-	AB	BB	BB	-	AA	-	-	-	AB	BB	-	AB	AB
zt411	contact	-	AB	BB	-	BB	-	-	-	BB	BB	-	BB	AA	-	AA	AB
zt650	contact	-	-	BB	-	AB	-	-	AB	-	BB	-	AB	BB	BB	AB	AA
zt653	contact	-	AA	BB	AB	-	-	-	AB	-	-	-	AB2	AB	AB	AB	AA
zm15526	contact	AA	AB	BB	-	BB	-	-	AA	-	AA	-	BB	BB	-	-	AA
zt269	contact	AB	AB	BB	-	-	AB	-	-	BB	-	AA	-	AA	BB	-	AB
zt319	contact	AB	-	BB	AA	-	-	BB	AA	-	BB	AB	-	AB	-	-	AB
zt332	contact	AB	AB	BB	-	-	AA	BB	AA	-	BB	-	BB	-	-	-	AB
zt342	contact	AB	AB	BB	-	-	-	-	-	BB	AA	-	AB	AB	BB	-	AB
zt410	contact	AB	AB	BB	-	BB	-	-	AA	BB	BB	-	-	AB	-	-	AB
zt463	contact	AB	-	BB	AA	BB	-	AA	-	-	BB	AB	-	BB	-	-	AB
zm15286	contact	BB	AB	BB	-	-	-	-	AA	-	-	AB	AB	AA	AB	-	AB
zt419	contact	-	AB	BB	AA	-	-	BB	-	AA	BB	-	-	-	-	AA	AB
zt636	contact	-	-	-	AB	BB	-	-	BB	-	BB	-	AB	-	BB	AB	AB
zt637	contact	-	-	AB	-	-	-	-	AB	-	AB	AB	AB	-	BB	AB	AA
zt677	contact	-	AA	BB	AB	BB	-	-	-	-	AB	AA	-	-	BB	-	AB
zt416	contact	AA	AA	BB	AA	AA	-	-	AA	-	BB	-	-	-	-	-	AA
zt317	contact	AB	-	BB	-	AA	-	BB	-	-	-	-	BB	AA	-	AA	AA
zt331	contact	AB	AB	BB	-	-	AA	-	-	-	BB	-	-	AB	-	AA	AA
zt631	contact	AB	-	BB	AA	-	-	BB	-	-	BB	-	-	BB	-	AA	AB
zm15287	contact	BB	AB	BB	-	BB	AA	-	-	-	-	-	AB	AB	-	-	AB
zm15619	contact	BB	-	-	AB	-	AB	-	AA	BB	-	-	-	AB	AB	-	BB
zt481	contact	BB	-	BB	-	-	-	-	-	AA	-	BB	-	BB	AB	AA	AA
zt186	contact	-	-	AB	-	-	AB	AA	AB	-	-	-	-	AB	BB	AB	-
zt634	contact	-	-	BB	AB	AB	-	-	-	-	BB	AA	AB2	-	-	BB	-
zt643	contact	-	BB	-	-	-	-	-	AB	-	BB	AB	AB	-	-	AB	AA
zt646	contact	-	-	BB	AB	AA	-	-	AA	-	BB	-	-	-	-	AB	AB
zt633	contact	-	-	AB	AB	AA	AA	-	-	-	-	-	-	BB	-	AB	-
zt658	contact	-	AA	-	AB	AB	-	-	-	-	-	-	AB	-	-	AB	BB
zt661	contact	-	AA	AA	AB	BB	-	-	AB	-	-	-	-	BB	-	-	-
zt671	contact	-	-	-	AB	BB	-	-	-	-	-	-	AB	AB	-	AB	AB
zt679	contact	-	BB	-	AB	-	-	-	-	-	BB	-	AB	-	-	AB	AA
zt660	contact	-	BB	AB	AB	-	-	-	-	-	-	-	AB	-	BB	-	-
zt640	contact	-	BB	-	-	-	-	-	-	-	-	-	AB	-	-	AB	AB
zt492	contact	-	-	AA	-	-	-	-	-	-	AB	-	AB2	-	-	-	-
zt641	contact	-	-	-	-	-	AB	-	-	-	-	-	-	-	-	AB	AA
zt638	contact	BB	AA	BB	-	-	-	-	-	-	-	-	-	-	-	-	-
zt639	contact	-	-	-	AB	AA	-	-	-	-	-	-	-	-	-	-	-
zt651	contact	-	-	-	AB	-	-	-	-	-	-	-	-	-	-	AB	-
zt675	contact	-	-	AB	-	-	-	-	-	-	-	-	-	-	-	-	AB
zt672	contact	-	-	-	-	-	-	-	-	-	BB	-	-	-	-	-	-
zm14822	ohio	AB	AB	AB	AA	AA	AB	AB	AB	AB	AB	AB	AB	BB	AB	AB	AB
zm14821	ohio	BB	AB	AB	AB	AB	AB	AB	AB	AB	BB	AB	AB	AB	AB	AB	AB
zm14826	ohio	AB	AB	BB	AB	AA	AA	AA	AB	-	BB	BB	AB	BB	AA	-	BB
zm14666	ohio	BB	AA	-	AA	BB	AA	BB	AB	BB	BB	-	AB	BB	BB	AB	AA
zm15130	ohio	BB	AB	BB	BB	BB	AA	AB	AA	-	AB	BB	AB2	BB	AB	-	AA
zm14673	ohio	AB	AB	-	AB	-	AA	-	AA	BB	BB	AA	AA	BB	AB	AB	AA
zm14700	ohio	AB	AB	BB	BB	AA	AA	AA	AA	-	BB	AB	-	AB	BB	-	AA
zm14817	ohio	AB	BB	-	AB	-	AB	AB	AB	AA	AB	AA	AB	AA	BB	-	AA
zm15128	ohio	AB	AB	AB	BB	-	AB	AB	AA	BB	-	BB	AB	-	BB	AB	-
zm15133	ohio	AB	AB	BB	-	BB	AB	BB	AA	AA	BB	-	-	BB	AB	AA	-
zm14672	ohio	BB	AB	BB	AA	-	AA	AA	AB	-	BB	-	AA	BB	AB	-	BB
zm15129	ohio	BB	BB	-	AB	-	BB	AB	AA	BB	AB	AA	-	-	AB	AB	AA
zm15541	ohio	BB	BB	BB	AB	-	AA	AB	-	-	BB	-	AB	BB	BB	AB	AA
zm14667	ohio	-	AB	-	BB	AB	AB	AB	AA	-	AA	AB	AB	-	AB	-	AA
zm15149	ohio	-	AB	-	BB	AB	AA	-	AA	-	BB	AA	AB	BB	BB	-	AA
zm14674	ohio	AB	AB	BB	-	BB	AA	-	-	-	AB	BB	AA	BB	BB	-	AA
zm14671	ohio	-	AA	AB	AB	-	AA	AB	AB	-	-	AA	AB	-	AB	-	AB
zm14818	ohio	-	-	-	AB	-	AA	AB	AB	-	BB	-	AB	BB	AB	AB	AA
zm15131	ohio	AA	BB	AB	AB	-	AA	-	AA	-	-	-	-	BB	AB	AB	AB
zm15135	ohio	AB	AB	BB	-	AA	AA	-	-	-	BB	-	-	BB	AB	AA	AA
zm14665	ohio	-	AB	-	BB	AA	AA	-	AA	-	-	BB	-	BB	AB	-	-
zm14782	ohio	AA	-	AB	AB	-	-	-	AB	-	AB	-	AB	-	BB	AB	-
zm14820	ohio	-	-	AA	AB	AA	-	AB	AA	-	-	-	AB	-	-	AB	-
zm15134	ohio	-	AB	-	-	-	-	-	AA	-	AB	-	AB	-	AB	AB	AA
zm15148	ohio	-	-	AA	AB	-	AB	-	-	-	BB	-	AB	-	BB	AB	-
zm14819	ohio	-	-	AA	AB	-	-	-	-	-	BB	BB	AB	-	-	BB	-
zm14823	ohio	-	-	AA	AB	-	-	AB	-	-	AB	-	AB2	-	-	AB	-
zm15132	ohio	-	-	AB	AB	-	AA	-	AB	-	-	-	AB	AA	-	-	-
zm15136	ohio	-	-	-	-	-	AA	-	-	-	AB	-	AB	-	BB	AB	-
zm14827	ohio	-	-	AA	AB	-	-	AB	-	-	-	-	-	-	-	AB	-
